# Supplementary material for: Theoretical study on the surface poisoning of high-entropy alloys during hydrogen storage cycles: the effect of metal elements and phases
Source: Royal Society of Chemistry journal article supplement (doi:10.1039/d4cp02831g), 2024-01-01
Supplement: d4cp02831g1.pdf [file d4cp02831g1.pdf]

**Supplementary Materials for:**

**Theoretical Study on Surface poisoning of high-entropy Alloys  
during Hydrogen Storage Cycles: The effect of Metal Elements  
and Phases**

Ming Jiang<sup>a</sup>, Yixin Yang<sup>a</sup>, Hongjiao Li<sup>\*a</sup>, Bin Liang<sup>a,b</sup>

a. School of Chemical Engineering, Sichuan University, Chengdu 610065, PR China

b. Institute of New Energy and Low-carbon Technology, Sichuan University, Chengdu 610207, China

For all correspondence: Dr. Hongjiao Li, [hongjiao.li@scu.edu.cn](mailto:hongjiao.li@scu.edu.cn)

| Table S1 – Surface energy of each surface termination of low-index surfaces in ZrCr <sub>2</sub> |                               |       |       |
|--------------------------------------------------------------------------------------------------|-------------------------------|-------|-------|
| Surface termination                                                                              | $\sigma$ (eV/Å <sup>2</sup> ) |       |       |
|                                                                                                  | (001)                         | (010) | (110) |
| Cr1                                                                                              | 0.161                         | 0.162 | 0.157 |
| Cr2                                                                                              | 0.163                         | –     | –     |
| Zr1                                                                                              | 0.163                         | 0.166 | –     |
| ZrCr1                                                                                            | –                             | 0.168 | 0.151 |
| ZrCr2                                                                                            | –                             | 0.141 | –     |

Table S2 – High entropy alloy  $V_{35}Ti_{30}Cr_{25}Fe_{10}$ , ZrTiVNiCrFe lattice parameters of each stage of hydrogen absorption and hydrogen storage capacity (simulated values, one of the sets)

| HEA                           | Phase   | a    | c    |
|-------------------------------|---------|------|------|
| $V_{35}Ti_{30}Cr_{25}Fe_{10}$ | BCC     | 2.97 |      |
|                               | BCT     | 2.92 | 3.29 |
|                               | FCC     | 4.22 |      |
| ZrTiVNiCrFe                   | Laves   | 4.92 | 7.97 |
|                               | Laves-H | 5.24 | 8.41 |

Table S3 – The optimal adsorption sites and binding energy of  $O_2$  on surfaces V, Ti, Cr, Fe and their hydrides

| Phase | Alloy   | Optimal adsorption site | $E_{bind}(eV)$ | note        |
|-------|---------|-------------------------|----------------|-------------|
| BCC   | V       | para2-1                 | -10.97         | Dissociated |
|       | Ti      | para2-1                 | -13.08         |             |
|       | Cr      | para2-1                 | -9.84          |             |
|       | Fe      | para2-1                 | -14.01         |             |
| BCT   | $V_2H$  | para2-1                 | -11.47         | Dissociated |
|       | $Ti_2H$ | para1-1                 | -13.03         |             |
|       | $Cr_2H$ | para2-1                 | -9.65          |             |
|       | $Fe_2H$ | para2-1                 | -7.72          |             |
| FCC   | $VH_2$  | para2-1                 | -5.72          | Dissociated |
|       | $TiH_2$ | para2-2                 | -7.10          |             |
|       | $CrH_2$ | para1-1                 | -4.43          |             |
|       | $FeH_2$ | para2-2                 | -2.16          |             |

Table S4 – The optimal adsorption sites and binding energy of O<sub>2</sub> on surfaces  
AB<sub>2</sub> alloy and their hydrides

| Phase       | Alloy                            | Optimal adsorption site | E <sub>bind</sub> (eV) | note        |
|-------------|----------------------------------|-------------------------|------------------------|-------------|
| Laves       | ZrV <sub>2</sub>                 | para1-1                 | -12.58                 | Dissociated |
|             | ZrNi <sub>2</sub>                | para2-1                 | -10.09                 |             |
|             | ZrCr <sub>2</sub>                | para1-2                 | -11.54                 |             |
|             | ZrFe <sub>2</sub>                | para1-1                 | -11.63                 |             |
|             | TiV <sub>2</sub>                 | para1-1                 | -12.55                 |             |
|             | TiNi <sub>2</sub>                | para1-1                 | -9.68                  |             |
|             | TiCr <sub>2</sub>                | para1-1                 | -12.20                 |             |
|             | TiFe <sub>2</sub>                | para1-1                 | -11.38                 |             |
| Laves-<br>H | ZrV <sub>2</sub> H <sub>3</sub>  | para1-3                 | -11.70                 | Dissociated |
|             | ZrNi <sub>2</sub> H <sub>3</sub> | para2-1                 | -8.30                  |             |
|             | ZrCr <sub>2</sub> H <sub>3</sub> | para1-2                 | -8.99                  |             |
|             | ZrFe <sub>2</sub> H <sub>3</sub> | para1-1                 | -8.78                  |             |
|             | TiV <sub>2</sub> H <sub>3</sub>  | para1-2                 | -11.66                 |             |
|             | TiNi <sub>2</sub> H <sub>3</sub> | para2-1                 | -8.68                  |             |
|             | TiCr <sub>2</sub> H <sub>3</sub> | para1-3                 | -9.75                  |             |
|             | TiFe <sub>2</sub> H <sub>3</sub> | para2-1                 | -8.72                  |             |

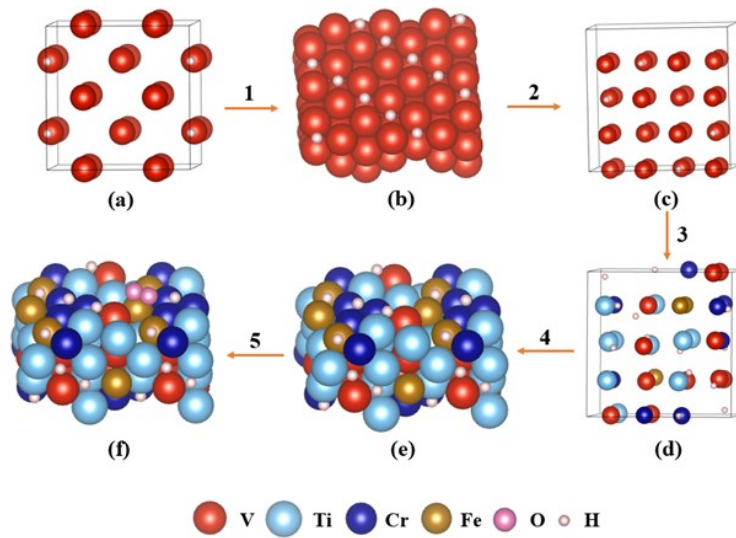

Fig. S1. Process of constructing surface models of high-entropy alloys (BCT structure as an example). (a): primitive bulk phase structure of  $V_2H$ , (b): the thermodynamically stable surface models of BCT structures, (c): new bulk BCT model derived from surface structure of (b), (d): relaxed high-entropy alloy bulk phase structure with substituted high-entropy alloy elements according to the composition, (e): surface structure of high-entropy alloys, (f) surface structure of high-entropy alloys with adsorbed oxygen molecular.

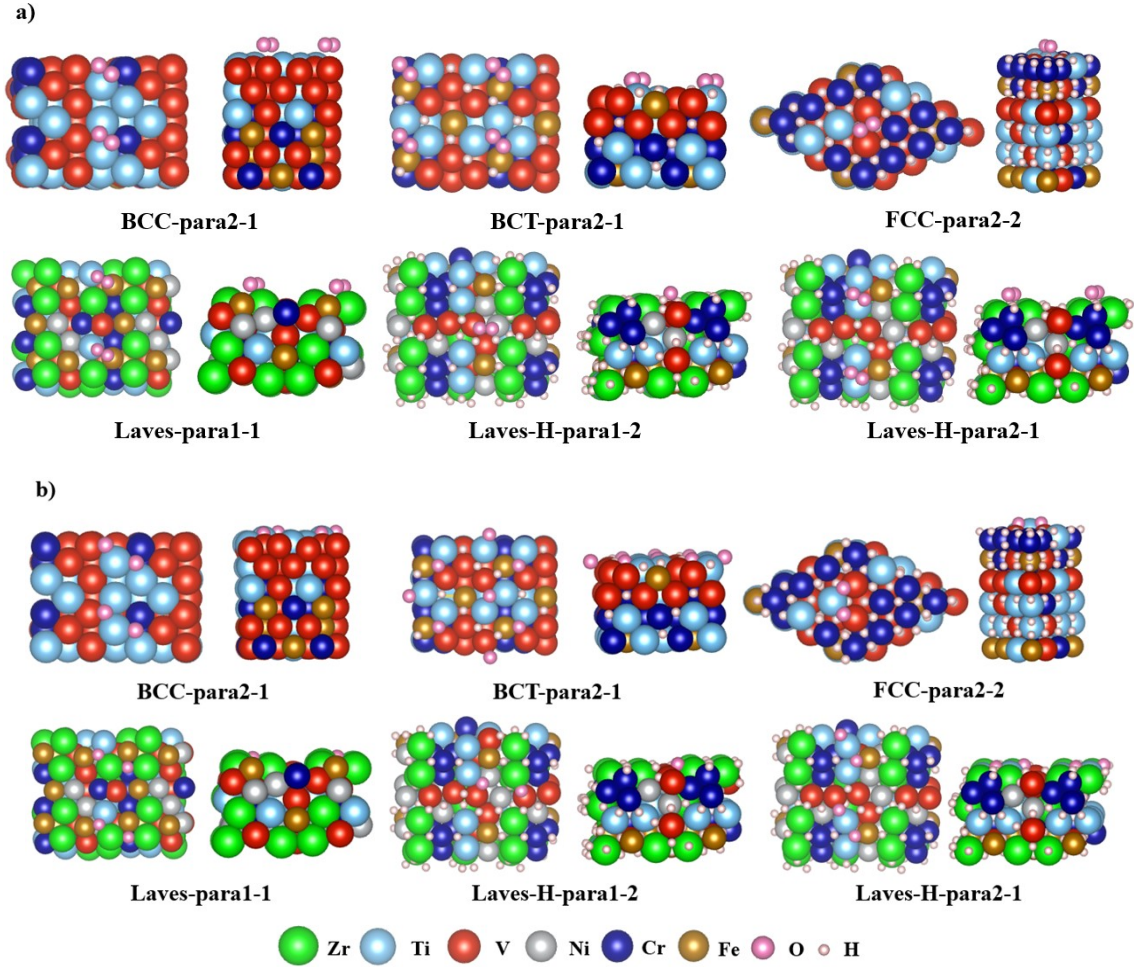

Fig. S2. Top view and side view of the initial (a) and the relaxed (b) O<sub>2</sub> adsorption geometries on the surfaces of high-entropy alloys.

As shown in Fig. 2, for pure elemental metals, there are two unequal adsorption sites on the BCC surface, i.e., top-sites of para1-1 (3-6), bridge/hollow sites of para2-1 (3-6-5-7); three unequal adsorption sites on the BCT surface, i.e., top sites of para1-1 (4-6), bridge/hollow sites of para2-1 (4-6-5-8), bridge/hollow sites of para2-2 (2-3-4-6); four unequal adsorption sites on the FCC surface, i.e., top sites of para1-1 (5-8), top sites of para1-2 (8-9), bridge/hollow sites of para2-1 (5-8-6-9), bridge/hollow sites of and bridge/hollow sites of para2-2 (5-6-8-9). For the AB<sub>2</sub> alloy, there are four unequal adsorption sites on the Laves surface, i.e., top sites of para1-1 (5-8), top sites of para1-2 (2-3), top sites of para1-3 (5-9), bridge/hollow sites of para2-1

(5-7-8-9); and five unequal adsorption sites on the Laves-H surface, i.e., top sites of para1-1 (5-8), top sites of para1-2 (2-3), top sites of para1-3 (5-9), top sites of para1-4 (3-4), and bridge/hollow sites of para2-1 (5-7-8-9). All the above-mentioned adsorption sites are considered and the most favorable adsorption sites are adopted for O<sub>2</sub> adsorption on surfaces of high-entropy alloys (Fig. S2) with each different phase structure of 20 series.

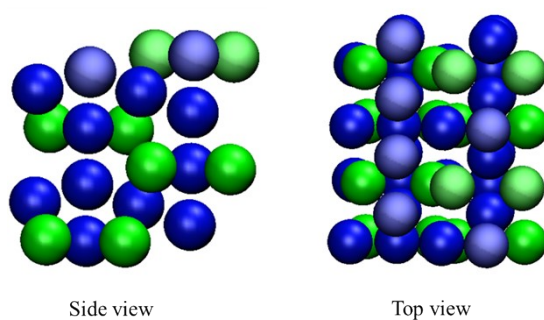

Fig. S3. Side view and top view of Laves ZrCr<sub>2</sub>(010) surface.

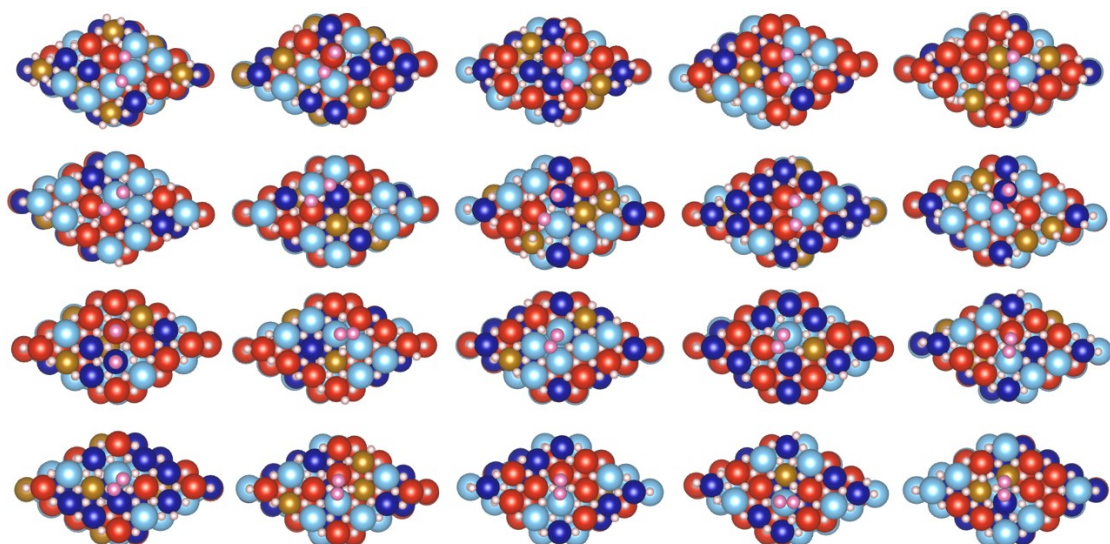

Fig. S4. Top views of the relaxed surfaces of high-entropy  $V_{35}Ti_{130}Cr_{25}Fe_{10}$  in FCC phase. (The binding energy increases from left to right.)

Below are the typical CONTCARs for the relaxed slab model for high entropy alloys in different phase states:

BCC(1110)

1.00000000000000

|                     |                     |                     |
|---------------------|---------------------|---------------------|
| 5.9492557918996951  | -0.0159069019499387 | -0.0141581668003391 |
| -0.0225419359179620 | 8.3901235555575990  | 0.0378527693285334  |
| -0.0301658481506720 | 0.0561153977788758  | 25.6253038500429255 |

V Ti Cr Fe

17 14 12 5

Selective dynamics

Direct

|                    |                     |                    |   |   |   |
|--------------------|---------------------|--------------------|---|---|---|
| 0.4950237255803557 | 0.0007669923539017  | 0.2462971895066035 | T | T | T |
| 0.7492554561606326 | 0.0038957305518537  | 0.1672672725120350 | F | F | F |
| 0.4885121394148868 | 0.2487780408902367  | 0.1626733774636264 | F | F | F |
| 0.7451594489351603 | 0.7604077310719717  | 0.2451480536585707 | T | T | T |
| 0.2462389656622150 | 0.2591702642997760  | 0.0846378302011885 | F | F | F |
| 0.0009444958651127 | 0.0021144762061949  | 0.2451463988434807 | T | T | T |
| 0.9949415885036278 | 0.5051273784341077  | 0.4050543266892937 | T | T | T |
| 0.7629120764058294 | 0.7757445573004673  | 0.4146285118516697 | T | T | T |
| 0.7527195600764145 | 0.5230461300917071  | 0.0061444237770303 | F | F | F |
| 0.9944550876749975 | 0.7501502609013525  | 0.3292600864341044 | T | T | T |
| 0.2456430091335093 | 0.9855590442035123  | 0.9996764973666288 | F | F | F |
| 0.4927324196776155 | 0.7540830754372294  | 0.1633110746459820 | F | F | F |
| 0.7491134201202777 | 0.2436589004698213  | 0.2407322947488640 | T | T | T |
| 0.5127020976624930 | 0.9972748579848895  | 0.4116902043342759 | T | T | T |
| 0.0056043737272589 | 0.9971158154681490  | 0.0837544994788715 | F | F | F |
| 0.9724095577863433 | 0.9872508749868526  | 0.4114900779230284 | T | T | T |
| 0.0075135252477452 | 0.2496184598899376  | 0.1623636612151884 | F | F | F |
| 0.5070454055146867 | 0.5039881867880796  | 0.4136696884477545 | T | T | T |
| 0.4909035036284187 | 0.4995110893924588  | 0.2489212144264698 | T | T | T |
| 0.5023693730517561 | 0.2576485546458038  | 0.3330976028644235 | T | T | T |
| 0.9928798627050952 | 0.2611431394882544  | 0.0034227347397007 | F | F | F |
| 0.0061987100485297 | 0.7534894177921956  | 0.1620333025759422 | F | F | F |
| 0.2387121711301381 | 0.2226945621279851  | 0.4241317629835745 | T | T | T |
| 0.7554280721408020 | 0.9869609449859880  | 0.0005643800289263 | F | F | F |
| 0.5065173526391575 | 0.2591774924231984  | 0.0035282638883558 | F | F | F |
| 0.2423520672640859 | -0.0004013286915004 | 0.3312778275354479 | T | T | T |
| 0.9902770976145054 | 0.2554758612960307  | 0.3316747604820501 | T | T | T |
| 0.7454466895116525 | 0.4971676082286223  | 0.1613088438454895 | F | F | F |
| 0.4965393374641767 | 0.7457799550699169  | 0.3308950234557939 | T | T | T |
| 0.0140977972042441 | 0.5016006019260092  | 0.2488699538063372 | T | T | T |



|                    |                    |                    |   |   |   |
|--------------------|--------------------|--------------------|---|---|---|
| 0.5008841891868059 | 0.9977358897002517 | 0.0837116063044334 | F | F | F |
| 0.2296516790865162 | 0.7592195937708018 | 0.4071474917687842 | T | T | T |
| 0.2489418651671897 | 0.0037047755289947 | 0.1633905475619457 | F | F | F |
| 0.2543436725477690 | 0.5014277426725897 | 0.1597443889189805 | F | F | F |
| 0.4890640949250482 | 0.5065008256346104 | 0.0829100361694373 | F | F | F |
| 0.7450856884212366 | 0.9947655517525388 | 0.3276436959550609 | T | T | T |
| 0.0105822277727938 | 0.5061700045719633 | 0.0827066077913443 | F | F | F |
| 0.2518137834231737 | 0.7438558441756982 | 0.0796737203375457 | F | F | F |
| 0.2479854489650958 | 0.2375552140210128 | 0.2454685814670009 | T | T | T |
| 0.0075168639234633 | 0.7438898342866906 | 0.0023581640844128 | F | F | F |
| 0.7618058933796356 | 0.5144862984658312 | 0.3346940847258348 | T | T | T |
| 0.4933024926981062 | 0.7441103832420097 | 0.0027067120187709 | F | F | F |
| 0.2504732726367561 | 0.7613221735761584 | 0.2458801825919781 | T | T | T |
| 0.2484858846709983 | 0.5070149131892876 | 0.0021086883388151 | F | F | F |
| 0.7500051671182462 | 0.7529059273070260 | 0.0838118622993420 | F | F | F |
| 0.7519860257791819 | 0.2511555216056180 | 0.0837834618586371 | F | F | F |
| 0.2490659942933650 | 0.5002324574215237 | 0.3347908881010228 | T | T | T |
| 0.7465004218186747 | 0.2496596711454970 | 0.4066482643798515 | T | T | T |

BCT\(\1\1\0)

1.00000000000000

|                    |                    |                     |
|--------------------|--------------------|---------------------|
| 6.5998902412711553 | 0.0134794419517220 | 0.0068709953729304  |
| 0.0159807924434084 | 8.2673510421460641 | 0.0098607952333174  |
| 0.0086245674725776 | 0.0100100274621219 | 21.4447687187555047 |

| V  | Ti | Cr | Fe | H  |
|----|----|----|----|----|
| 11 | 10 | 8  | 3  | 16 |

Selective dynamics

Direct

|                    |                    |                    |   |   |   |
|--------------------|--------------------|--------------------|---|---|---|
| 0.8453961456735417 | 0.1158573824550913 | 0.0947547516325891 | T | T | T |
| 0.8668154586424350 | 0.3661665360232575 | 0.0027388995825248 | F | F | F |
| 0.1142131539768684 | 0.8717974350911638 | 0.2862939384617063 | T | T | T |
| 0.3595759515824919 | 0.1238928308575284 | 0.2867074573995659 | T | T | T |
| 0.6417235440025166 | 0.1149386384617230 | 0.0035888733159055 | F | F | F |
| 0.4077298095160700 | 0.1158393981785534 | 0.0946718233115694 | T | T | T |
| 0.1360509840992272 | 0.8736497757357203 | 0.0950937478267155 | T | T | T |
| 0.9042179310824494 | 0.8793888221687212 | 0.0050219603511934 | F | F | F |
| 0.8886214281907856 | 0.3589959173868278 | 0.1950469093679265 | T | T | T |
| 0.1419398371195863 | 0.1151297341162270 | 0.1898915296687150 | T | T | T |
| 0.0944506771985710 | 0.6256589042856291 | 0.1956892541524902 | T | T | T |
| 0.6270920947542322 | 0.6375868048642062 | 0.0037912841601155 | F | F | F |
| 0.3618702008701908 | 0.6235756964149807 | 0.0962034333762457 | T | T | T |

|                    |                    |                    |   |   |   |
|--------------------|--------------------|--------------------|---|---|---|
| 0.6450825453757197 | 0.3755888947477179 | 0.2933004793005214 | T | T | T |
| 0.6487189385098721 | 0.8631969099360731 | 0.2940042481483670 | T | T | T |
| 0.4066958756316852 | 0.8708885085419320 | 0.1943759593067068 | T | T | T |
| 0.8986189793422513 | 0.1164820259149109 | 0.2899120097008309 | T | T | T |
| 0.0930728950654620 | 0.3750741668169814 | 0.0935279197858474 | T | T | T |
| 0.3699747284555288 | 0.3672333075105675 | 0.1953969150185592 | T | T | T |
| 0.3867294403673114 | 0.3668059373625283 | 0.0018776116782462 | F | F | F |
| 0.3526748501950733 | 0.6267458791340824 | 0.2921265393611668 | T | T | T |
| 0.8561319464241325 | 0.8659666332769000 | 0.1920332928064064 | T | T | T |
| 0.3471229391439792 | 0.8698150521495407 | 0.0024704892216434 | F | F | F |
| 0.6580866266384436 | 0.6256149728801533 | 0.1949287786670354 | T | T | T |
| 0.1029874381051741 | 0.1150281222441123 | 0.0028511757485816 | F | F | F |
| 0.1113095068888419 | 0.3558197088229264 | 0.2831393491104593 | T | T | T |
| 0.8971693755686408 | 0.6212650530853480 | 0.2827948762191055 | T | T | T |
| 0.1409865083191235 | 0.6397475380120383 | 0.0015549091968197 | F | F | F |
| 0.6532851244346563 | 0.3700098559870922 | 0.0926416948351319 | T | T | T |
| 0.9115163032771462 | 0.6323212259610368 | 0.0987095942897526 | T | T | T |
| 0.5954491569946405 | 0.1206091132332785 | 0.1930168655524787 | T | T | T |
| 0.5856891739401121 | 0.8716156423005493 | 0.0996495086864723 | T | T | T |
| 0.3860456589235466 | 0.3694605333649161 | 0.0957812365343519 | T | T | T |
| 0.3620567914910471 | 0.8856360270395801 | 0.3286526211388263 | T | T | T |
| 0.1247816115181877 | 0.4266424937710696 | 0.9822999548253293 | F | F | F |
| 0.1200994014191351 | 0.8843845947793173 | 0.1881444795346191 | T | T | T |
| 0.1266063774854347 | 0.1126045307229698 | 0.0952825926732683 | T | T | T |
| 0.0873387133583096 | 0.6899619905384099 | 0.3365658105908276 | T | T | T |
| 0.8894549901560609 | 0.5910566516052498 | 0.9793164165976407 | F | F | F |
| 0.8565810251043772 | 0.1112456452928847 | 0.1932994481823199 | T | T | T |
| 0.8496571102445434 | 0.8717781493676978 | 0.0983210909807115 | T | T | T |
| 0.9049720022192020 | 0.4412557880155606 | 0.3319575685217973 | T | T | T |
| 0.6217884389735104 | 0.8819867935920627 | 0.9917507148251445 | F | F | F |
| 0.6384953886241601 | 0.4211721770209407 | 0.1742492282080035 | T | T | T |
| 0.6586093828482671 | 0.6027832253980272 | 0.0989834863271417 | T | T | T |
| 0.6204784573602597 | 0.1342681220436178 | 0.3312154669074893 | T | T | T |
| 0.3663716713311800 | 0.1150032298067600 | 0.9923320986947743 | F | F | F |
| 0.3816946202084919 | 0.6170057533000355 | 0.1983045298162144 | T | T | T |

FCC(1\1\1)

1.00000000000000

|                     |                     |                     |
|---------------------|---------------------|---------------------|
| 8.9483324509993221  | -0.0092465813515133 | -0.0023294746002584 |
| -4.4821769530994304 | 7.7394498746981855  | 0.0008493825952624  |
| -0.0038057225612677 | -0.0005936344296927 | 28.3871039922196928 |

|    |    |    |    |     |
|----|----|----|----|-----|
| V  | Ti | Cr | Fe | H   |
| 19 | 16 | 14 | 5  | 108 |

Selective dynamics

Direct

|                     |                    |                    |   |   |   |
|---------------------|--------------------|--------------------|---|---|---|
| 0.8843239644080354  | 0.4411337218775820 | 0.3657558031476323 | T | T | T |
| 0.2178683144323369  | 0.4350602346284690 | 0.3652068282242247 | T | T | T |
| 0.1125952583545313  | 0.2274789374331405 | 0.0170235540513204 | F | F | F |
| 0.5580393247354181  | 0.1126877524356544 | 0.1041572612678578 | F | F | F |
| 0.5557833206225100  | 0.4483899377508732 | 0.3658196868202137 | T | T | T |
| 0.4430850721438446  | 0.2168491953883560 | 0.0193568782892015 | F | F | F |
| 0.1120564286374300  | 0.8882630313322850 | 0.2819058302532673 | T | T | T |
| 0.6679139562706636  | 0.6674744901196226 | 0.4464980808994282 | T | T | T |
| 0.3355936343272248  | 0.9965467724502020 | 0.1937975702142722 | F | F | F |
| 0.6592642495179462  | 0.6611609062807702 | 0.1938614408790542 | F | F | F |
| 0.3299896089376352  | 0.3223169536142037 | 0.4466199581275240 | T | T | T |
| 0.8870266568996499  | 0.4397456634941008 | 0.1064562365436217 | F | F | F |
| 0.5558298182265151  | 0.1096161743265602 | 0.3662494086498578 | T | T | T |
| 0.4435094800919606  | 0.8883973176531661 | 0.2794896712725706 | T | T | T |
| 0.1096809223246356  | 0.2241967131586847 | 0.2819397309364393 | T | T | T |
| 0.6711650767813353  | 0.3356322379675518 | 0.1937991037505640 | F | F | F |
| 0.2224243592848824  | 0.7850767773361853 | 0.3649014980345068 | T | T | T |
| 0.5555587376023892  | 0.7781318387140884 | 0.3654329136388983 | T | T | T |
| 0.5578986048933388  | 0.4470230603808645 | 0.1061683873240540 | F | F | F |
| 0.4507562441474604  | 0.2274813103140867 | 0.2806370720372874 | T | T | T |
| 0.2312977874639017  | 0.7818410618591187 | 0.1040357145675586 | F | F | F |
| 0.7746816489119689  | 0.8843590178515631 | 0.2828413405547808 | T | T | T |
| 0.2263849853674600  | 0.1112527824854865 | 0.1037024391445485 | F | F | F |
| 0.3360427362856271  | 0.3436634797105071 | 0.1949227545357886 | F | F | F |
| 0.3382183367521044  | 0.6704588049561402 | 0.4494571398589056 | T | T | T |
| 0.6581734517869364  | 0.9983294294381722 | 0.1932384756029606 | F | F | F |
| 0.8842617686759979  | 0.1150186038791290 | 0.1057022967114705 | F | F | F |
| 0.7766513830200168  | 0.5488497968873034 | 0.0199332960875509 | F | F | F |
| -0.0037269012262500 | 0.6696261895500426 | 0.4499145047320514 | T | T | T |
| 0.0026442484645770  | 0.0032663534139417 | 0.1952541489477539 | F | F | F |
| 0.8846474700181446  | 0.7754791471153055 | 0.1056823085746643 | F | F | F |
| 0.7707209562542374  | 0.8893905003435378 | 0.0177217978026931 | F | F | F |
| 0.0006738611627810  | 0.6623427246228957 | 0.1947943221633253 | F | F | F |
| 0.2260540553606063  | 0.4514813539912623 | 0.1061472503175978 | F | F | F |
| 0.1100381518885410  | 0.5509182826853797 | 0.2794469432968649 | T | T | T |
| 0.7788384406333458  | 0.2237647285679344 | 0.2796061780556287 | T | T | T |
| 0.7798979469454039  | 0.2251136837606040 | 0.0190880165186513 | F | F | F |
| 0.6653757855926152  | 0.3259177246567363 | 0.4455935690238718 | T | T | T |
| 0.8925449135022061  | 0.7759484656321265 | 0.3661582387539971 | T | T | T |

|                    |                    |                    |   |   |   |
|--------------------|--------------------|--------------------|---|---|---|
| 0.5529498369544683 | 0.7755425310896769 | 0.1061564728459459 | F | F | F |
| 0.1094180054217659 | 0.5477550468061665 | 0.0194756581480107 | F | F | F |
| 0.0011297985168866 | 0.0050191566399724 | 0.4440708843356075 | T | T | T |
| 0.4460170763066075 | 0.5567472459022941 | 0.2796430955568080 | T | T | T |
| 0.9935208441728981 | 0.3243827567333578 | 0.4451451318086237 | T | T | T |
| 0.9978451101064465 | 0.3373951426180213 | 0.1945745055593449 | F | F | F |
| 0.2213886495615235 | 0.1081003291304185 | 0.3659721846046033 | T | T | T |
| 0.3386931650006280 | 0.0087363851123023 | 0.4460488489834032 | T | T | T |
| 0.6713349105091033 | 0.0080611120924314 | 0.4451551616351577 | T | T | T |
| 0.4401549341447151 | 0.5505188105651015 | 0.0207554478784289 | F | F | F |
| 0.1093087178601095 | 0.8913305255765351 | 0.0180084621007310 | F | F | F |
| 0.8878114892637686 | 0.1133054994677430 | 0.3658337429137365 | T | T | T |
| 0.4463208568879793 | 0.8891470343423080 | 0.0196848199848745 | F | F | F |
| 0.3344978195308101 | 0.6683212092622455 | 0.1933797194381555 | F | F | F |
| 0.7766987403875648 | 0.5540202395766221 | 0.2795636998744808 | T | T | T |
| 0.5560451983988273 | 0.1034519826749118 | 0.0390175176812519 | F | F | F |
| 0.3404462989581347 | 0.3391187470055712 | 0.1283020225608169 | F | F | F |
| 0.1219342842370708 | 0.5523836082166795 | 0.2136600671796529 | F | F | F |
| 0.5639160007492724 | 0.1106485466493025 | 0.3021572315774045 | T | T | T |
| 0.3313114219477923 | 0.3263703719709379 | 0.3850044440971245 | T | T | T |
| 0.1006316666523841 | 0.5351212537477785 | 0.4768026976841372 | T | T | T |
| 0.3371149028248368 | 0.3341191715834384 | 0.9991215157422673 | F | F | F |
| 0.1052433473989183 | 0.5539948052128807 | 0.0817743817282164 | F | F | F |
| 0.5531753205004364 | 0.1169703250444272 | 0.1693486531934028 | F | F | F |
| 0.3330471975235781 | 0.3409999428309598 | 0.2607908919703999 | T | T | T |
| 0.1093270869256081 | 0.5544638187329833 | 0.3461858958840151 | T | T | T |
| 0.5557831885664342 | 0.1098192027971066 | 0.4298034136762724 | T | T | T |
| 0.5464200056827551 | 0.4392454431968389 | 0.0412527877904196 | F | F | F |
| 0.3435407824269063 | 0.0041505009147116 | 0.1289876741333558 | F | F | F |
| 0.1073327651126377 | 0.2332947342685046 | 0.2178108218522254 | F | F | F |
| 0.5667368156609663 | 0.4606815687592543 | 0.3013820140827218 | T | T | T |
| 0.3336326462017475 | 0.0057056722871008 | 0.3861786771234221 | T | T | T |
| 0.1035051484015125 | 0.2170491291794838 | 0.4742008415650744 | T | T | T |
| 0.3275984952946231 | 0.9873748872058457 | 0.9991409097324038 | F | F | F |
| 0.1114223112865815 | 0.2254624173584716 | 0.0811102810126840 | F | F | F |
| 0.5610617408531553 | 0.4453528206735839 | 0.1707255146701456 | F | F | F |
| 0.3320687132801719 | 0.9972393414034206 | 0.2583346808423459 | T | T | T |
| 0.1028116864105962 | 0.2102218369730228 | 0.3462408005209940 | T | T | T |
| 0.5568050130803068 | 0.4383552836822295 | 0.4297783242855010 | T | T | T |
| 0.2237250260165666 | 0.4474987655888967 | 0.0394557490706902 | F | F | F |
| 0.0003933730293681 | 0.0032497746752327 | 0.1283596121374941 | F | F | F |
| 0.4491716789346967 | 0.2228932185606212 | 0.2144633705782439 | F | F | F |
| 0.2303772698861009 | 0.4450161822660549 | 0.3015266134024273 | T | T | T |

|                    |                    |                    |   |   |   |
|--------------------|--------------------|--------------------|---|---|---|
| 0.9970075780194846 | 0.0022983158390226 | 0.3836101584584171 | T | T | T |
| 0.4494464962081051 | 0.2192595312651341 | 0.4752189623672806 | T | T | T |
| 0.0062507642030383 | 0.0004242400669128 | 0.9968774313725461 | F | F | F |
| 0.4544509298768631 | 0.2275176010941991 | 0.0826829025200269 | F | F | F |
| 0.2183110881282317 | 0.4565913852733061 | 0.1734483003821836 | F | F | F |
| 0.0034771736999993 | 0.0018316781903529 | 0.2617687659080891 | T | T | T |
| 0.4420536783170243 | 0.2217338750859211 | 0.3471270321912974 | T | T | T |
| 0.2142421625662990 | 0.4336104519009609 | 0.4296304657188427 | T | T | T |
| 0.2175258414293708 | 0.1047781685906344 | 0.0369686075822315 | F | F | F |
| 0.0004439056470176 | 0.3395452946953412 | 0.1309115249294237 | F | F | F |
| 0.4423214259500483 | 0.5698986438595171 | 0.2173225415797333 | F | F | F |
| 0.2198847269492260 | 0.1114431564724607 | 0.3036983935370945 | T | T | T |
| 0.9930769420502152 | 0.3240035997033240 | 0.3850968355674122 | T | T | T |
| 0.4484059779012636 | 0.5458675570519155 | 0.4761677939545200 | T | T | T |
| 0.9962452248163913 | 0.3346080423444207 | 0.9979897538296996 | F | F | F |
| 0.4529488553878167 | 0.5628947473446644 | 0.0832131471061075 | F | F | F |
| 0.2313266245513717 | 0.1135536736057929 | 0.1715576779831238 | F | F | F |
| 0.9916020142697907 | 0.3240365179087454 | 0.2573262956009404 | T | T | T |
| 0.4428684689638409 | 0.5548721095373833 | 0.3432459793690859 | T | T | T |
| 0.2179192334986464 | 0.1028251554584718 | 0.4281987588486875 | T | T | T |
| 0.5413727866523672 | 0.7730062276828065 | 0.0419245363781826 | F | F | F |
| 0.5450750978105930 | 0.7696610350743841 | 0.3016430685857827 | T | T | T |
| 0.5441492949153286 | 0.7675560721950205 | 0.1700502741983030 | F | F | F |
| 0.5678987922198786 | 0.7902562239516030 | 0.4293085999988501 | T | T | T |
| 0.3460293551635658 | 0.6751910612477090 | 0.1313747422343283 | F | F | F |
| 0.1177570010378233 | 0.8893541276391304 | 0.2180674144645565 | F | F | F |
| 0.3299418677662420 | 0.6649066509999952 | 0.3841473431789158 | T | T | T |
| 0.1188656855395303 | 0.9107404874123597 | 0.4756377233263875 | T | T | T |
| 0.3356272755324952 | 0.6706429841308363 | 0.0036169091175466 | F | F | F |
| 0.1101501616642793 | 0.8851143716786822 | 0.0791961677800472 | F | F | F |
| 0.3396766148434908 | 0.6650810324444604 | 0.2562448880872990 | T | T | T |
| 0.1078456997957821 | 0.8918580091320012 | 0.3458489808359212 | T | T | T |
| 0.0022232211371005 | 0.6613354709527712 | 0.1276924865578550 | F | F | F |
| 0.4326681596510653 | 0.8750145377886511 | 0.2157205865183656 | F | F | F |
| 0.9986354883798056 | 0.6669002666086572 | 0.3848588363632441 | T | T | T |
| 0.4570631312182150 | 0.9106068553420792 | 0.4760908090260941 | T | T | T |
| 0.0138648390319034 | 0.6731913517053272 | 0.0021830152366391 | F | F | F |
| 0.4580442508966485 | 0.8919500023524733 | 0.0805654663890110 | F | F | F |
| 0.9907433557839058 | 0.6651971409602322 | 0.2609260225923993 | T | T | T |
| 0.4452331260769906 | 0.8895351000359564 | 0.3441763491334822 | T | T | T |
| 0.2276719438764943 | 0.7840574587385376 | 0.0356638363233515 | F | F | F |
| 0.2241067010025342 | 0.7798574253113513 | 0.3014164230431266 | T | T | T |
| 0.2326555921895022 | 0.7757568657080611 | 0.1716741807934312 | F | F | F |

|                    |                    |                    |   |   |   |
|--------------------|--------------------|--------------------|---|---|---|
| 0.2270151348352594 | 0.7908057089361964 | 0.4295363489544492 | T | T | T |
| 0.7717230184188750 | 0.5536923351356577 | 0.2183971458292078 | F | F | F |
| 0.7609544700131450 | 0.5399069825868351 | 0.4760032550855027 | T | T | T |
| 0.7756404547368163 | 0.5471510508530741 | 0.0852425997204236 | F | F | F |
| 0.7803463368944239 | 0.5597027539345480 | 0.3425119521319843 | T | T | T |
| 0.7824225311676685 | 0.2278712386161317 | 0.2167731972307934 | F | F | F |
| 0.7780375166075401 | 0.2221998318957673 | 0.4744604894712196 | T | T | T |
| 0.7733196697625786 | 0.2257424352453654 | 0.0812797450434033 | F | F | F |
| 0.7798364406329981 | 0.2175194664173675 | 0.3435307113567741 | T | T | T |
| 0.8949014896455196 | 0.4380944515184382 | 0.0415114700493717 | F | F | F |
| 0.6542410775438228 | 0.9918064742394321 | 0.1267357037614119 | F | F | F |
| 0.8759775301525027 | 0.4408567384735375 | 0.3007576466759243 | T | T | T |
| 0.6754639400087707 | 0.0039955770606831 | 0.3849180465235888 | T | T | T |
| 0.6553611280530944 | 0.0067246985245291 | 0.9975447844396967 | F | F | F |
| 0.8872524102570978 | 0.4368612672381431 | 0.1710573028229803 | F | F | F |
| 0.6663773956275063 | 0.0049532082221350 | 0.2601170555956573 | T | T | T |
| 0.8845248740225433 | 0.4354982008267700 | 0.4297543054028666 | T | T | T |
| 0.8902961656579009 | 0.1203201790189823 | 0.0388031496653127 | F | F | F |
| 0.6652658447628355 | 0.3318051669020363 | 0.1285750760336484 | F | F | F |
| 0.8861274539302278 | 0.1176973934200755 | 0.3043158527814570 | T | T | T |
| 0.6635987545699498 | 0.3323607219008990 | 0.3856756942925740 | T | T | T |
| 0.6632552590660694 | 0.3208258311467773 | 0.9974987638255968 | F | F | F |
| 0.8898426683828689 | 0.1212171288248030 | 0.1729534961883132 | F | F | F |
| 0.6811087128628518 | 0.3432533742335784 | 0.2584300638762941 | T | T | T |
| 0.8873956946942873 | 0.1086683635686482 | 0.4274558223571591 | T | T | T |
| 0.7699269635521375 | 0.8809202997125354 | 0.2163342903607059 | F | F | F |
| 0.7830633002176036 | 0.8988289472965845 | 0.4736039257317618 | T | T | T |
| 0.7649845271328388 | 0.8850017757965176 | 0.0836540511870680 | F | F | F |
| 0.7860710362445006 | 0.8936759725576794 | 0.3492034150627643 | T | T | T |
| 0.6553371434867614 | 0.6650329745756665 | 0.1293230574441822 | F | F | F |
| 0.6730465723795114 | 0.6717285879778262 | 0.3845274665150140 | T | T | T |
| 0.6544429823958637 | 0.6576367200036302 | 0.9979496722118526 | F | F | F |
| 0.6629251390385105 | 0.6541530617412666 | 0.2590807141757162 | T | T | T |
| 0.8966969167983052 | 0.7836816861599800 | 0.0389223260737808 | F | F | F |
| 0.8881026794805246 | 0.7646253404015789 | 0.3036073854402951 | T | T | T |
| 0.8804670855725547 | 0.7716791030427430 | 0.1728801418305608 | F | F | F |
| 0.8891698704626881 | 0.7882942647756542 | 0.4282995024275634 | T | T | T |

Laves\0\1\0)

1.00000000000000

7.9738475510405022      0.0005032370251708      -0.0112980912980975

0.0009804805802823    9.8496029270137075    -0.0719412224975174  
 -0.0120975736811735    -0.0623398780022642    22.0972872239984000

Zr    Ti    V    Ni    Cr    Fe  
 8    8    8    8    8    8

Selective dynamics

Direct

|                    |                     |                    |   |   |   |
|--------------------|---------------------|--------------------|---|---|---|
| 0.0596359875449721 | 0.9993732562020554  | 0.0003532716837782 | F | F | F |
| 0.9488488997156078 | 0.7711886836855797  | 0.3190630997279980 | T | T | T |
| 0.0626208475898901 | 0.7391550388470831  | 0.1921027578910780 | T | T | T |
| 0.4419810656057611 | 0.7576343364292047  | 0.1932130341229442 | T | T | T |
| 0.9324617783489590 | -0.0049761013213289 | 0.1329564395928923 | T | T | T |
| 0.5687198566593298 | 0.5013426616667211  | 0.1276799360586334 | T | T | T |
| 0.5575813500045359 | 0.7422050458612852  | 0.3246429438437941 | T | T | T |
| 0.4320182758065911 | 0.5039778826679111  | 0.9995270166303456 | F | F | F |
| 0.5598547453654998 | 0.2599352017651955  | 0.3134600857903481 | T | T | T |
| 0.4354795503785889 | 0.2452373072501858  | 0.1931660492978378 | T | T | T |
| 0.9437014014715459 | 0.4919778607225037  | 0.1251561122529217 | T | T | T |
| 0.0539523116435490 | 0.5015501640981768  | 0.0019298020696468 | F | F | F |
| 0.0664253383947474 | 0.2525900831494345  | 0.1921103100219444 | T | T | T |
| 0.5634343239945012 | 0.9991930039371167  | 0.1256749815002175 | T | T | T |
| 0.9299893419868779 | 0.2377638496734145  | 0.3108830280493058 | T | T | T |
| 0.4416619377077851 | 0.0066809947824424  | 0.0016330729688150 | F | F | F |
| 0.2541719212241577 | 0.1193798769799114  | 0.0953811400444962 | T | T | T |
| 0.2494174748658651 | 0.2566737402913404  | 0.9987658002032944 | F | F | F |
| 0.7478845236272499 | 0.3611294405963680  | 0.2187056536457584 | T | T | T |
| 0.5177058530687828 | 0.0049813079969200  | 0.2680746127726221 | T | T | T |
| 0.5057084753709375 | 0.2448835428643932  | 0.0667191614754827 | F | F | F |
| 0.7461705582625413 | 0.8798046511562276  | 0.0340300263653361 | F | F | F |
| 0.2389356404868022 | 0.1262129357164579  | 0.2928379598988139 | T | T | T |
| 0.4827702675049387 | 0.4948368755656163  | 0.2552442980521735 | T | T | T |
| 0.7513151307707782 | 0.1237722942485594  | 0.2222349193347380 | T | T | T |
| 0.2563266744228596 | 0.8663482838560862  | 0.2863540839213510 | T | T | T |
| 0.7541179153212667 | 0.3771242894664439  | 0.0306417224559610 | F | F | F |
| 0.7556120083015734 | 0.8704021155658798  | 0.2265820111457356 | T | T | T |
| 0.2444300432959267 | 0.6192937205795122  | 0.2875770257384263 | T | T | T |
| 0.0005955816912149 | 0.2543010122010685  | 0.0659134150686498 | F | F | F |
| 0.2478142921490445 | 0.7479374052029328  | 0.9985730867824643 | F | F | F |
| 0.2588727466244771 | 0.0061335164353559  | 0.1918656689415840 | T | T | T |
| 0.7483356801584122 | 0.1244073195591682  | 0.0332748057236287 | F | F | F |
| 0.7197920881309434 | 0.0081589549756967  | 0.3194146401583740 | T | T | T |
| 0.2568964640672785 | 0.8720343990465730  | 0.0921215132257159 | T | T | T |
| 0.4991883439144118 | 0.7553730774533278  | 0.0668295060092348 | F | F | F |
| 0.9929024431797111 | 0.4892302809587071  | 0.2603983389483742 | T | T | T |

|                    |                    |                    |   |   |   |
|--------------------|--------------------|--------------------|---|---|---|
| 0.2502771106538385 | 0.3815152235867413 | 0.0953343907995863 | T | T | T |
| 0.7827454010218049 | 0.4901611112968826 | 0.3120029677286166 | T | T | T |
| 0.7575873275339688 | 0.6239907281911741 | 0.0312201223513426 | F | F | F |
| 0.7491239960440084 | 0.2494071125507892 | 0.1276943063642441 | T | T | T |
| 0.2427874740336327 | 0.3441477219910610 | 0.2781114505039214 | T | T | T |
| 0.7417646951108908 | 0.6258819700598189 | 0.2250553634115724 | T | T | T |
| 0.7529989235797517 | 0.7417327569599438 | 0.1319208012511406 | T | T | T |
| 0.2484227097744922 | 0.4886061540027571 | 0.1869214918634853 | T | T | T |
| 0.0094468575497068 | 0.0193570487694646 | 0.2600266366970582 | T | T | T |
| 0.9988511881177544 | 0.7400261563627737 | 0.0654238291747191 | F | F | F |
| 0.2472742671152350 | 0.6223014197633306 | 0.0935237612213042 | T | T | T |

Laves-H(0\1\0)

1.00000000000000

|                     |                     |                     |
|---------------------|---------------------|---------------------|
| 8.4084160025020847  | -0.0929687286761127 | -0.0352733371081418 |
| -0.0303398055683045 | 10.4861394173438516 | -0.0964817561321420 |
| -0.0382289009216598 | -0.0826987722580370 | 23.9573516419523358 |

|    |    |   |    |    |    |   |    |
|----|----|---|----|----|----|---|----|
| Zr | Ti | V | Ni | Cr | Fe | H |    |
| 8  | 8  | 8 | 8  | 8  | 8  | 8 | 48 |

Selective dynamics

Direct

|                    |                     |                    |   |   |   |
|--------------------|---------------------|--------------------|---|---|---|
| 0.9232445160718796 | 0.9972101615850685  | 0.1467869106874252 | T | T | T |
| 0.5712337780835774 | 0.2872350985436042  | 0.3360312041809346 | T | T | T |
| 0.4359727172859696 | 0.2428343816504135  | 0.2102005385818479 | T | T | T |
| 0.4340712579746082 | 0.9985626671542676  | 0.0287319728063551 | F | F | F |
| 0.0551939994612949 | 0.7553156577911231  | 0.2100347709295390 | T | T | T |
| 0.5506735824872832 | 0.5019033523210463  | 0.1524068038981032 | T | T | T |
| 0.9188398570269866 | 0.5042216614534288  | 0.1456953704579042 | T | T | T |
| 0.0584316017413223 | 0.2562619850020300  | 0.2097305288626242 | T | T | T |
| 0.9398169038745733 | 0.7381488309125155  | 0.3255581670025558 | T | T | T |
| 0.5478722494784740 | 0.9947195020737941  | 0.1579389043809739 | T | T | T |
| 0.5685040226911084 | 0.7208123808067256  | 0.3252472202837657 | T | T | T |
| 0.4282777059278616 | 0.7417109068551085  | 0.2115097996663283 | T | T | T |
| 0.9429096122397213 | 0.2603344944007400  | 0.3257473106259900 | T | T | T |
| 0.0497235209570519 | 0.5101072665305963  | 0.0187634715200531 | F | F | F |
| 0.0570015903617431 | 0.0017886003341729  | 0.0209754469981291 | F | F | F |
| 0.4299143579923381 | 0.5048495033283018  | 0.0231320291733113 | F | F | F |
| 0.4754379623365987 | -0.0030084115321709 | 0.2852742982881433 | T | T | T |
| 0.7437564897743053 | 0.8893116128460581  | 0.2537261510570203 | T | T | T |
| 0.2502897742049228 | 0.2612095761201161  | 0.0301559324271850 | F | F | F |
| 0.5147515868965868 | 0.7517971506270911  | 0.0875492474186501 | F | F | F |



|                    |                     |                    |   |   |   |
|--------------------|---------------------|--------------------|---|---|---|
| 0.7857294665267190 | 0.0300209934893302  | 0.3290623348975018 | T | T | T |
| 0.2266536392592960 | 0.1245467033594308  | 0.3141376116521497 | T | T | T |
| 0.2479948729706710 | 0.3831974524551816  | 0.3136221283191581 | T | T | T |
| 0.9821463263908186 | 0.2590515065811232  | 0.0888404414936588 | F | F | F |
| 0.7444301227427000 | 0.5234335863026869  | 0.3336249688681578 | T | T | T |
| 0.7420345908739989 | 0.3834931132647981  | 0.0560254298374971 | F | F | F |
| 0.7351794776122648 | 0.3887773818929482  | 0.2487002246662333 | T | T | T |
| 0.7346814493711236 | 0.1311501579340657  | 0.0585768483866147 | F | F | F |
| 0.9813192969427863 | 0.5089762466774517  | 0.2751876313533769 | T | T | T |
| 0.2347330709744255 | 0.1199873051674798  | 0.1184314002336199 | T | T | T |
| 0.2633900013655435 | 0.7542232046067099  | 0.0248443277492854 | F | F | F |
| 0.4946166057224965 | 0.5039701510040897  | 0.2749854123058398 | T | T | T |
| 0.2365626176974502 | 0.6072526370284644  | 0.2987124848460360 | T | T | T |
| 0.2421473579414701 | 0.5159725076067305  | 0.2188561660630664 | T | T | T |
| 0.2308303054892967 | 0.3647152559168529  | 0.1078824646749762 | T | T | T |
| 0.0031829601047093 | 0.7396687098467538  | 0.0882547905340303 | F | F | F |
| 0.2310311068493967 | 0.8715903521970005  | 0.3079488024575121 | T | T | T |
| 0.2703604596518617 | -0.0010578738379131 | 0.2174293747965356 | T | T | T |
| 0.0182918410630182 | 0.0026490580334948  | 0.2796100396281138 | T | T | T |
| 0.2237085351861223 | 0.6293979679752767  | 0.1124972714945847 | T | T | T |
| 0.7493925173855449 | 0.1287143384906815  | 0.2516804054870196 | T | T | T |
| 0.7710611056389851 | 0.2555003903820018  | 0.1441812493735679 | T | T | T |
| 0.4912825038300426 | 0.2546570004100701  | 0.0822487118815971 | F | F | F |
| 0.7254994590713935 | 0.6423333292157878  | 0.0573120286322961 | F | F | F |
| 0.7476044945399352 | 0.8752342506905819  | 0.0590364090906235 | F | F | F |
| 0.2415092234248324 | 0.8677800737174256  | 0.1187706057831638 | T | T | T |
| 0.7642984952280304 | 0.7582314559951692  | 0.1456166999311699 | T | T | T |
| 0.7312073745837050 | 0.6263819040890741  | 0.2457379430856036 | T | T | T |
| 0.0489597053141893 | 0.1872676359538090  | 0.0222649297113904 | F | F | F |
| 0.0518289342080864 | 0.4527361738211639  | 0.2123607695753914 | T | T | T |
| 0.4247545232458018 | 0.3386808102199563  | 0.1374660134397634 | T | T | T |
| 0.4432641437201291 | 0.1078381428056192  | 0.3454363679020632 | T | T | T |
| 0.4435095029647660 | 0.1517544633227821  | 0.1307864988806956 | T | T | T |
| 0.3787547680324024 | 0.3668481438925076  | 0.3706991170285980 | T | T | T |
| 0.3579785011321274 | 0.4999331054349430  | 0.0984781718154852 | T | T | T |
| 0.3704236554828018 | 0.2512275392891866  | 0.2925169379679654 | T | T | T |
| 0.6405349640418765 | 0.1497636079461226  | 0.1871426611321076 | T | T | T |
| 0.6284529408069091 | 0.4301247401377140  | 0.0016394448196664 | F | F | F |
| 0.6345959701504285 | 0.9978381850580931  | 0.0809559133862052 | F | F | F |
| 0.6290399499611472 | 0.2546276600705537  | 0.2587612631634434 | T | T | T |
| 0.8663495860815971 | 0.4024756331519228  | 0.9968767392648203 | F | F | F |
| 0.8579162768138757 | 0.1574949834437786  | 0.1898395472579773 | T | T | T |
| 0.8665587709421771 | 0.0134052878329669  | 0.0656559732090045 | F | F | F |

|                    |                    |                    |   |   |   |
|--------------------|--------------------|--------------------|---|---|---|
| 0.8618500020055627 | 0.2698247610670757 | 0.2561451940715290 | T | T | T |
| 0.7394411582626431 | 0.3899408202196990 | 0.1798118174535212 | T | T | T |
| 0.7723376257020196 | 0.2019470718819795 | 0.3752062843656949 | T | T | T |
| 0.2353123661617929 | 0.4195440980691316 | 0.0043028714487221 | F | F | F |
| 0.2380853614603046 | 0.1428026674210199 | 0.1869068482069323 | T | T | T |
| 0.1068486140867080 | 0.4924252169747945 | 0.0969477908743741 | F | F | F |
| 0.1502205642595742 | 0.2623327844427362 | 0.3594927267110997 | T | T | T |
| 0.2378192761406908 | 0.0955699968877610 | 0.0436549062625318 | F | F | F |
| 0.2555043921596963 | 0.3581703638767279 | 0.2374937291248176 | T | T | T |
| 0.0592824833993788 | 0.6961405496234434 | 0.0201381042294528 | F | F | F |
| 0.0633078108823277 | 0.9537007229732820 | 0.2114877463992400 | T | T | T |
| 0.4227385135935262 | 0.8430300874999327 | 0.1472764470587490 | T | T | T |
| 0.1956355668345512 | 0.5139819234945753 | 0.3565945879647673 | T | T | T |
| 0.4219014566132544 | 0.6584052605806551 | 0.1403044610841803 | T | T | T |
| 0.4269748978328952 | 0.8852945794230672 | 0.3428120739870821 | T | T | T |
| 0.3617011234864666 | 0.9900174191515825 | 0.1091578860463268 | T | T | T |
| 0.3673450581589900 | 0.7359066757538840 | 0.2913940635411067 | T | T | T |
| 0.6321244673697216 | 0.6714969528854868 | 0.1869559924129747 | T | T | T |
| 0.6326927248589200 | 0.8993740786933486 | 0.0044965353592019 | F | F | F |
| 0.6119108922854082 | 0.5178659545180366 | 0.0710527602454789 | F | F | F |
| 0.6118925994809704 | 0.7555841721474381 | 0.2547269319672815 | T | T | T |
| 0.8787315664833173 | 0.8908052021191040 | 0.0065533246107634 | F | F | F |
| 0.8514070540061465 | 0.6577532003561252 | 0.1894448239997510 | T | T | T |
| 0.8629874952413843 | 0.5264813275655200 | 0.0655796323905236 | F | F | F |
| 0.8589179031046467 | 0.7489452972938977 | 0.2566695570656881 | T | T | T |
| 0.7316115052354331 | 0.8985736300128927 | 0.1781818665406603 | T | T | T |
| 0.7545770675492650 | 0.6594404468775459 | 0.3719373732541196 | T | T | T |
| 0.2305870631014812 | 0.8991558699734128 | 0.0035976998260239 | F | F | F |
| 0.2391011844790711 | 0.6560509134634167 | 0.1838055221714915 | T | T | T |
| 0.1210634076762602 | 0.9781063368465723 | 0.0995584748241853 | F | F | F |
| 0.1639192862843424 | 0.7395378504372543 | 0.3486708904277535 | T | T | T |
| 0.2495962009108652 | 0.6049244621752123 | 0.0403813878998349 | F | F | F |
| 0.2603137055699538 | 0.8425543322259645 | 0.2380582846225635 | T | T | T |
